# Supplementary material for: MEDYAN: Mechanochemical Simulations of Contraction and Polarity Alignment in Actomyosin Networks
Source: PubMed Central journal article supplement (PMC4847874; doi:10.1371/journal.pcbi.1004877), 2016-04-27
Supplement: pcbi.1004877.s005.pdf [file pcbi.1004877.s005.pdf]

Supporting Information for  
**MEDYAN: Mechanochemical Simulations of  
Contraction and Polarity Alignment in  
Actomyosin Networks**

Konstantin Popov, James Komianos, and Garegin Papoian

**A comparison of MEDYAN to other agent-based cytoskeletal models.**

This table is shown on the next page, with comparison categories as discussed in the Introduction section. Those categories are organized as follows:

- **Chemistry** - The implementation of cytoskeletal chemistries within the model, which could include (but not limited to) filament, cross-linker, and molecular motor chemical dynamics.
- **Mechanics** - The force-field description of semi-flexible filaments in the model, as well as other mechanical elements, including cross-linkers and molecular motors.
- **Diffusion and active transport** - The capability of the model to include diffusion and active transport of some or all of its cytoskeletal species.
- **Mechanochemical feedback** - The model's capability to include force-dependent reaction rates for some or all of its cytoskeletal species, which are updated dynamically during runtime.
- **Dimensionality, time and length scales** - The previous time and length scales achieved by the model in its publications.
- **Public code availability** - The access of source code and/or example applications for the model in a public repository.

| Model                                                                             | Chemistry                                                                                                                                                                                                                                                                                              | Mechanics                                                                                                                                                                                                                                                                                                                              | Diffusion and active transport                                                                                                                                                                            | Mechanochemical feedback                                                                                                                                   | Dimensionality, time and length scales                                                                                                    | Public code availability                                                                                                                                                       | Refs     |
|-----------------------------------------------------------------------------------|--------------------------------------------------------------------------------------------------------------------------------------------------------------------------------------------------------------------------------------------------------------------------------------------------------|----------------------------------------------------------------------------------------------------------------------------------------------------------------------------------------------------------------------------------------------------------------------------------------------------------------------------------------|-----------------------------------------------------------------------------------------------------------------------------------------------------------------------------------------------------------|------------------------------------------------------------------------------------------------------------------------------------------------------------|-------------------------------------------------------------------------------------------------------------------------------------------|--------------------------------------------------------------------------------------------------------------------------------------------------------------------------------|----------|
| SCPR, Bidone et al. 2014, Tang et al. 2014, Laporte et al. 2012, Wang et al. 2008 | <ul style="list-style-type: none"> <li>Stochastic growth of actin filaments</li> <li>Binding of cross-linkers and motors from bulk reservoir</li> <li>No filament branching reported</li> </ul>                                                                                                        | <ul style="list-style-type: none"> <li>Langevin dynamics with a coarse-grained point-like representation for filaments</li> <li>Actin filament bending and stretching, motor and cross-linker interaction potentials</li> <li>No inter-filament excluded volume effects reported</li> </ul>                                            | <ul style="list-style-type: none"> <li>Filaments diffuse via Brownian motion</li> </ul>                                                                                                                   | None reported                                                                                                                                              | <ul style="list-style-type: none"> <li>2D, 3D</li> <li>1000 <i>s</i> timescales</li> <li>5-15 <math>\mu m</math> length scales</li> </ul> | None reported                                                                                                                                                                  | [1–4]    |
| Cytosim, Nédélec and Foethke 2002-2007                                            | <ul style="list-style-type: none"> <li>Stochastic growth of filaments</li> <li>Binding of cross-linkers and motors from bulk reservoir</li> <li>Filament branching</li> </ul>                                                                                                                          | <ul style="list-style-type: none"> <li>Langevin dynamics with a coarse-grained point-like representation for filaments</li> <li>Interaction potentials for filaments, cross-linkers, motors, branching molecules, in various versions.</li> <li>Repulsion or attraction between filament points for excluded volume effects</li> </ul> | <ul style="list-style-type: none"> <li>Filaments diffuse via Brownian motion</li> </ul>                                                                                                                   | <ul style="list-style-type: none"> <li>Mechanochemical models for filaments, cross-linkers, motors</li> </ul>                                              | <ul style="list-style-type: none"> <li>2D, 3D</li> <li>Time and length scales vary greatly depending on simulated system</li> </ul>       | <ul style="list-style-type: none"> <li>Example applications available for download at <a href="http://www.cytosim.org">www.cytosim.org</a></li> </ul>                          | [5, 6]   |
| Jung et al 2015, Kim et al. 2009-2014                                             | <ul style="list-style-type: none"> <li>Stochastic growth of actin filaments</li> <li>Binding of cross-linkers from bulk reservoir</li> <li>Stochastic myosin II filament binding and walking</li> </ul>                                                                                                | <ul style="list-style-type: none"> <li>Langevin dynamics with a coarse-grained cylindrical segmentation for actin filaments</li> <li>Cross-linker interaction potentials and very detailed myosin II potentials</li> <li>Nearest-distance repulsion for cylinder excluded volume</li> </ul>                                            | <ul style="list-style-type: none"> <li>Filaments diffuse via Brownian motion</li> <li>Myosin II filaments diffuse via Brownian motion</li> <li>Actin monomers and cross-linkers do not diffuse</li> </ul> | <ul style="list-style-type: none"> <li>Detailed mechanochemical models for cross-linker unbinding, and myosin II filament walking and unbinding</li> </ul> | <ul style="list-style-type: none"> <li>3D</li> <li>200 <i>s</i> timescales</li> <li>2-5 <math>\mu m</math> length scales</li> </ul>       | None reported                                                                                                                                                                  | [7–9]    |
| Muller et al. 2015, Cyron et al. 2009-2013                                        | <ul style="list-style-type: none"> <li>Cross-linker spatially resolved binding onto filaments</li> <li>No growth or nucleation of filaments</li> <li>Does not implement filament branching</li> </ul>                                                                                                  | <ul style="list-style-type: none"> <li>Finite-element Brownian dynamics of semi-flexible filament bending and stretching</li> <li>Cross-linker interaction potentials</li> <li>Inter-filament excluded volume not reported in detail</li> </ul>                                                                                        | <ul style="list-style-type: none"> <li>Filaments and cross-linkers diffuse via Brownian motion</li> <li>Actin monomers do not diffuse</li> </ul>                                                          | None reported                                                                                                                                              | <ul style="list-style-type: none"> <li>3D</li> <li>1000 <i>s</i> timescales</li> <li>1-10 <math>\mu m</math> length scales</li> </ul>     | None reported                                                                                                                                                                  | [10–13]  |
| Odell et al. 2008                                                                 | <ul style="list-style-type: none"> <li>Spatially resolved, stochastic chemical reactions via cytoplasmic domains</li> <li>Mass-action kinetic equations for chemical reactions within cytoplasmic domains</li> <li>Stochastic nucleation and growth of microtubules</li> </ul>                         | <ul style="list-style-type: none"> <li>Coarse-grained microtubules by spring segments, with bending and stretching potentials</li> <li>No inter-filament excluded volume reported</li> </ul>                                                                                                                                           | <ul style="list-style-type: none"> <li>Continuum diffusive flux between cytoplasmic domains</li> <li>Convective transport modeled by viscous drag force on cytoplasmic domains</li> </ul>                 | <ul style="list-style-type: none"> <li>Mechanochemical model for microtubules</li> </ul>                                                                   | <ul style="list-style-type: none"> <li>3D</li> <li>500 <i>s</i> timescales</li> <li>80 <math>\mu m</math> length scales</li> </ul>        | <ul style="list-style-type: none"> <li>Example application available for download at <a href="http://www.celldynamics.org">www.celldynamics.org</a></li> </ul>                 | [14]     |
| Rafelski et al. 2008, Alberts et al. 2004                                         | <ul style="list-style-type: none"> <li>Spatially resolved, stochastic chemical reactions via partial differential equation reaction-diffusion scheme</li> <li>Stochastic branching, nucleation and growth of actin filaments</li> <li>Stochastically varying biochemical states of filament</li> </ul> | <ul style="list-style-type: none"> <li>Brownian dynamics of branched, rigid actin filaments and collision interactions with surfaces</li> <li>No inter-filament excluded volume reported</li> </ul>                                                                                                                                    | <ul style="list-style-type: none"> <li>Partial differential equation reaction-diffusion scheme for actin monomers and branching molecules</li> </ul>                                                      | None reported                                                                                                                                              | <ul style="list-style-type: none"> <li>3D</li> <li>100 <i>s</i> timescales</li> <li>10 <math>\mu m</math> length scales</li> </ul>        | <ul style="list-style-type: none"> <li>Source code and example application available for download at <a href="http://www.celldynamics.org">www.celldynamics.org</a></li> </ul> | [15, 16] |
| MEDYAN                                                                            | <ul style="list-style-type: none"> <li>Stochastic reaction-diffusion master equation</li> <li>Stochastic, spatially resolved filament nucleation and branching, growth, and state transitions</li> <li>Cross-linker and motor dynamics</li> </ul>                                                      | <ul style="list-style-type: none"> <li>Conjugate gradient energy minimization</li> <li>Interaction potentials for cross-linkers, motors, branching molecules, and filaments</li> <li>Novel cylindrical rigid body repulsion</li> </ul>                                                                                                 | <ul style="list-style-type: none"> <li>Stochastic, compartment based reaction-diffusion scheme for general transport of any unbound cytosolic species</li> <li>No Brownian motion of filaments</li> </ul> | <ul style="list-style-type: none"> <li>Detailed mechanochemical models for filaments, cross-linkers, and motors</li> </ul>                                 | <ul style="list-style-type: none"> <li>3D</li> <li>2000 <i>s</i> timescales</li> <li>1-3 <math>\mu m</math> length scales</li> </ul>      | <ul style="list-style-type: none"> <li>Source code and example applications available for download at <a href="http://www.medyan.org">www.medyan.org</a></li> </ul>            | -        |

## References

- [1] Bidone TC, Tang H, Vavylonis D. Dynamic Network Morphology and Tension Buildup in a 3D Model of Cytokinetic Ring Assembly. *Biophys J.* 2014;107(11):2618–2628.
- [2] Tang H, Laporte D, Vavylonis D. Actin cable distribution and dynamics arising from cross-linking, motor pulling and filament turnover. *Mol Biol Cell.* 2014;25(19):3006–3016.
- [3] Laporte D, Ojkc N, Vavylonis D, Wu JQ. Alpha-Actinin and fimbrin cooperate with myosin II to organize actomyosin bundles during contractile-ring assembly. *Mol Biol Cell.* 2012;23(16):3094–3110.
- [4] Wang H, Vavylonis D. Model of For3p-Mediated Actin Cable Assembly in Fission Yeast. *PLoS One.* 2008;3(12):e4078.
- [5] Nédélec F. Computer simulations reveal motor properties generating stable antiparallel microtubule interactions. *J Cell Biol.* 2002;158(6):1005–1015.
- [6] Nédélec F, Foethke D. Collective Langevin dynamics of flexible cytoskeletal fibers. *New J Phys.* 2007;9(11):427.
- [7] Kim T. Determinants of contractile forces generated in disorganized actomyosin bundles. *Biomech Model Mechanobiol.* 2014;14(2):345–355.
- [8] Kim T, Gardel ML, Munro ED. Determinants of Fluidlike Behavior and Effective Viscosity in Cross-Linked Actin Networks. *Biophys J.* 2014;106(3):526–534.
- [9] Jung W, Murrell MP, Kim T. F-actin cross-linking enhances the stability of force generation in disordered actomyosin networks. *Comput Part Mech.* 2015;2(4):317–327.
- [10] Müller KW, Cyron CJ, Wall WA. Computational analysis of morphologies and phase transitions of cross-linked, semi-flexible polymer networks. *Proc R Soc London A.* 2015;471(2182):20150332.
- [11] Cyron CJ, Müller KW, Schmoller KM, Bausch AR, Wall WA, Bruinsma RF. Equilibrium phase diagram of semi-flexible polymer networks with linkers. *Europhys Lett.* 2013;102(3):38003.
- [12] Cyron CJ, Müller KW, Bausch AR, Wall Wa. Micromechanical simulations of biopolymer networks with finite elements. *J Comput Phys.* 2013;244:236–251.
- [13] Cyron CJ, Wall WA. Finite-element approach to Brownian dynamics of polymers. *Phys Rev E.* 2009;80(6):1–12.
- [14] Odell GM, Foe VE. An agent-based model contrasts opposite effects of dynamic and stable microtubules on cleavage furrow positioning. *J Cell Biol.* 2008;183(3):471–483.
- [15] Rafelski SM, Alberts JB, Odell GM. An experimental and computational study of the effect of ActA polarity on the speed of *Listeria monocytogenes* actin-based motility. *PLoS Comput Biol.* 2009;5(7):e1000434.
- [16] Alberts JB, Odell GM. In silico reconstitution of *Listeria* propulsion exhibits nano-saltation. *PLoS Biol.* 2004;2(12):e412.
